# Supplementary material for: Quantitative Proteomic Analysis of Mouse Sciatic Nerve Reveals Post-injury Upregulation of ADP-Dependent Glucokinase Promoting Macrophage Phagocytosis
Source: Frontiers journal article supplement (doi:10.3389/fnmol.2021.777621), 2021-11-12
Supplement: Image_1.pdf [file Image_1.pdf]

## **SUPPLEMENTARY INFORMATION**

### **Quantitative proteomic analysis of mouse sciatic nerve reveals post-injury upregulation of ADP-dependent glucokinase promoting macrophage phagocytosis**

Kai Zhang, Qingyao Wang, Yiyao Liang, Yu Yan, Haiqiong Wang, Xu Cao, Bing Shan, Yaoyang Zhang, Ang Li, and Yanshan Fang

**Correspondence to:** fangys@sioc.ac.cn

#### **Supplementary Information includes:**

Supplementary Figures S1 to S2 and the legends

Supplementary Tables S1 to S4 (in separate excel files)

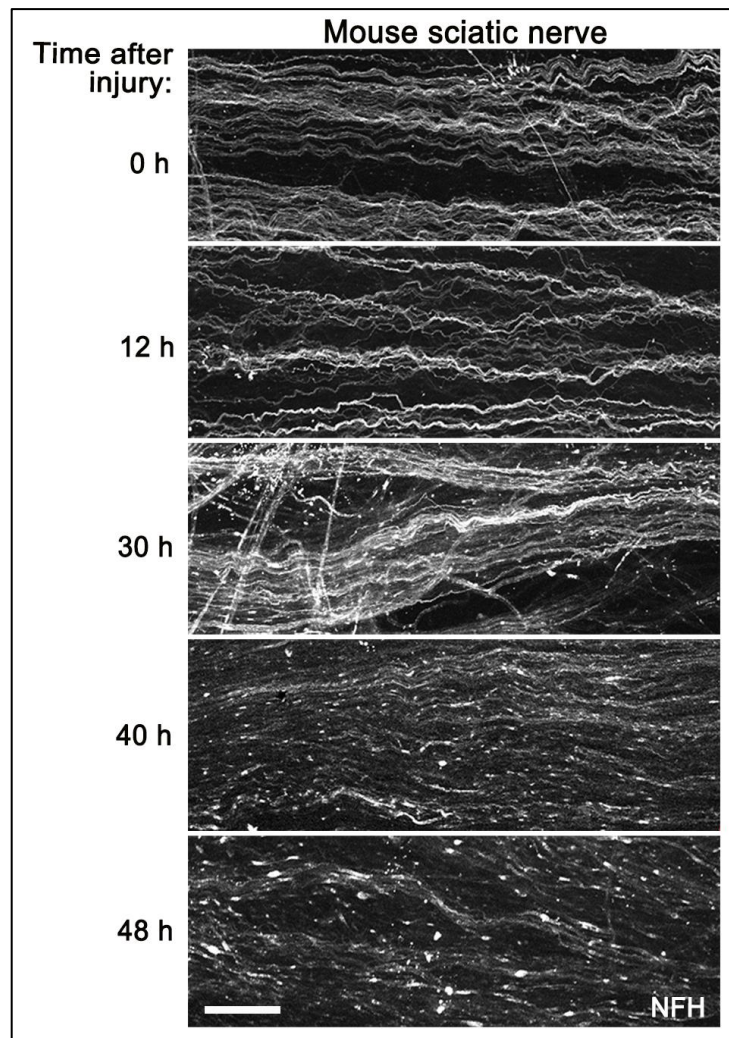

**Figure S1. The time course of axonal degeneration of injured mouse sciatic nerve.**

Whole-mount immunostaining on the mouse sciatic nerve at indicated time points after the crush injury. The axonal integrity is examined by immunostaining for neurofilament heavy chain (NFH), a protein marker for the neuro-axonal compartment. The mouse sciatic nerve starts to degenerate in between 30 and 40 hours after injury, evident by beading, disintegration and fragmentation of injured axons. Scale bar: 100  $\mu$ m.

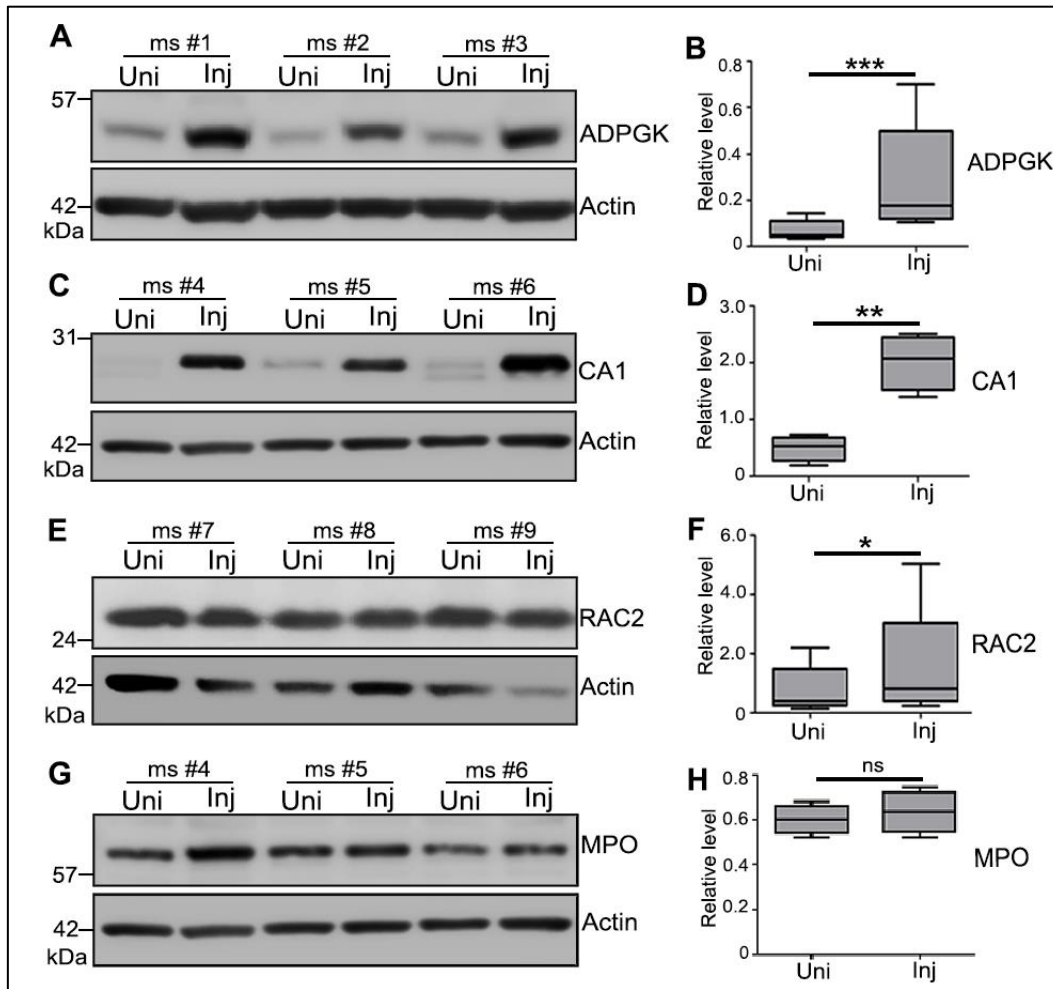

**Figure S2. Validation of the proteomic analysis-identified, significantly changed proteins in the injured mouse sciatic nerve.**

(A-H) The protein levels of four candidates in the list in Figure 2J were examined at 12 h after SNI by western blotting, including ADPGK (A-B), CA1 (C-D), RAC2 (E-F) and MPO (G-H). All protein levels are normalized to Actin. Uni, uninjured; Inj, injured. ms, mouse. At least 3 different mice were examined and the specific animal# tested in each assay is shown. Note that the same blot of Actin is shown in (C) and (G) because the protein samples from the same mice (#4 - #6) were separated in one SDS-PAGE gel and blotted with the antibodies for CA1 and MPO, respectively. Statistical significance is determined by paired *t*-test; \* $p < 0.05$ , \*\* $p < 0.01$  and \*\*\* $p < 0.001$ ; ns, not significant.
